# Supplementary material for: Tuning SERS Signal via Substrate Structuring: Valves of Different Diatom Species with Ultrathin Gold Coating
Source: Preprints.org preprint supplement (doi:10.20944/preprints202304.0551.v1), 2023-04-19
Supplement: Supplementary file 1 [file supplementary]

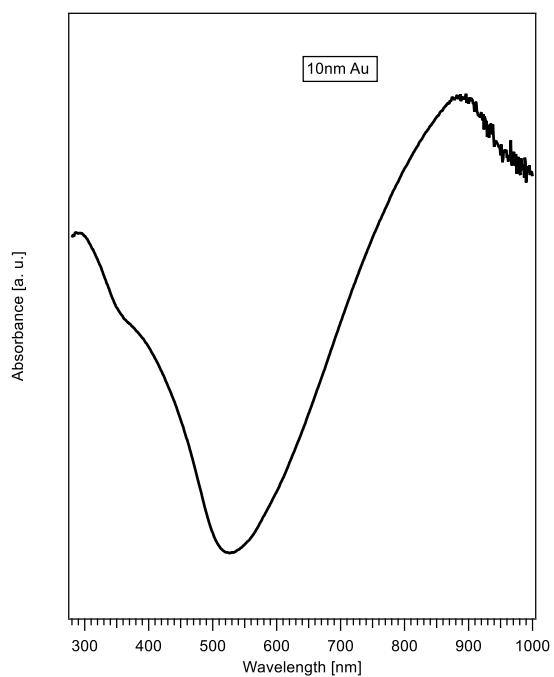

Fig. S1: UV – VIS Absorbance spectrum of a 10 nm gold film on a glass slide activated with MPTMS.

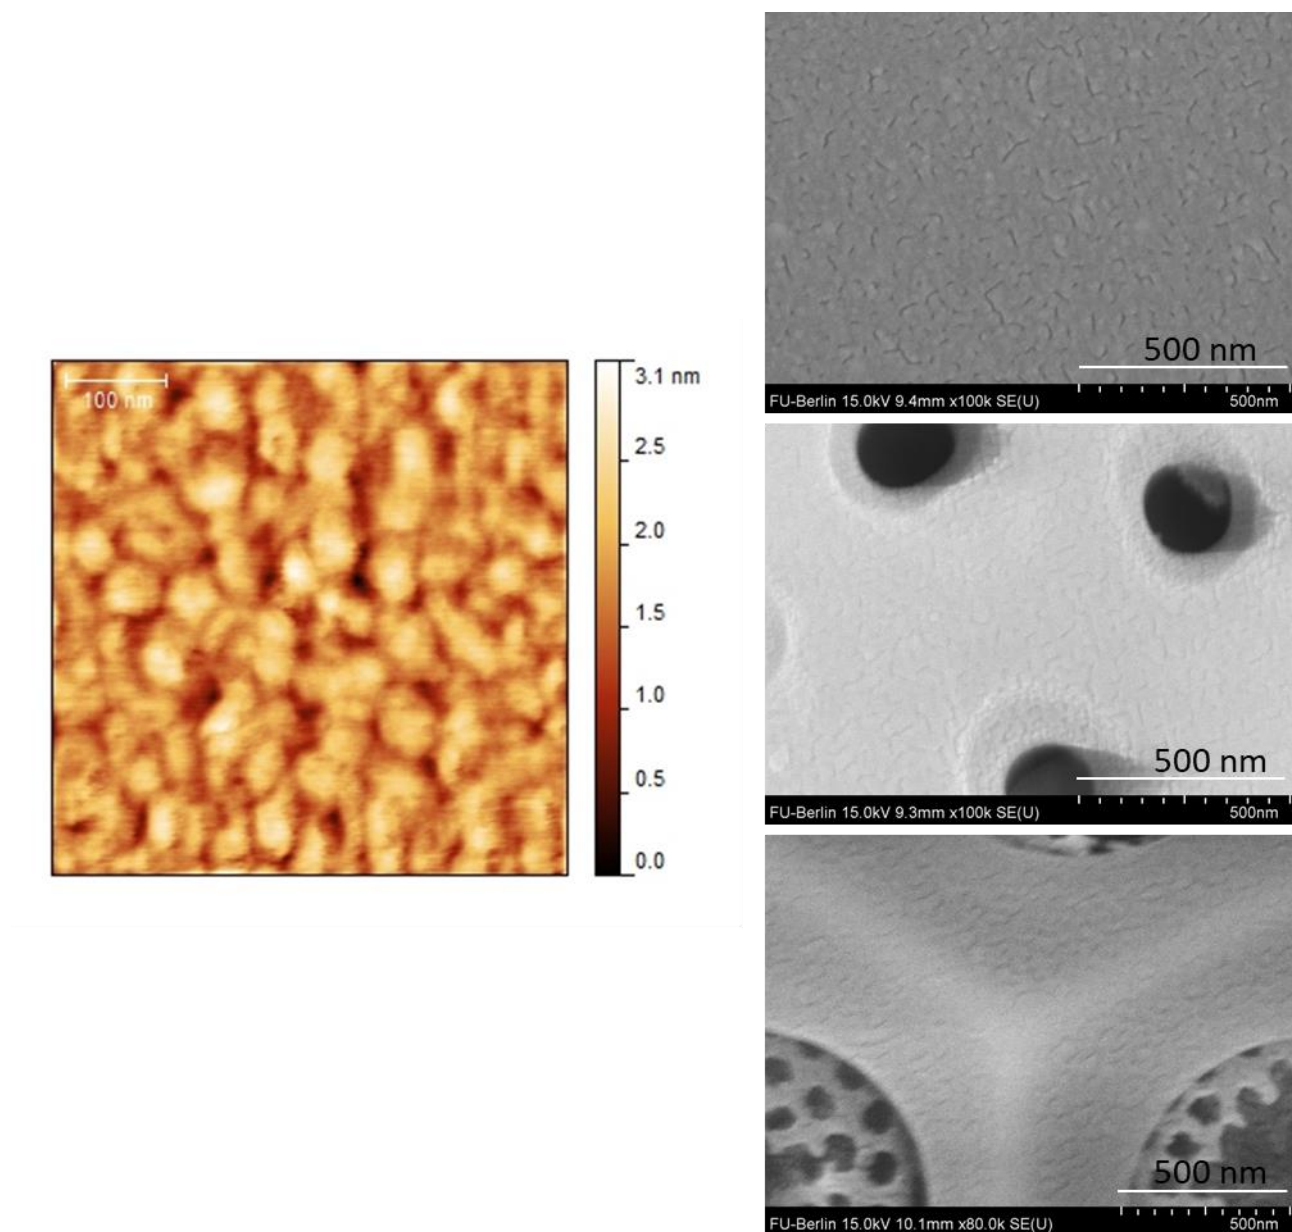

Fig. S2: AFM image of the 10 nm gold film on a glass slide (left); and SEM micrographs of the gold film on a glass slide (top right), Aula valve (middle right) and Cosc valve (bottom right). A glass slide was activated with MPTMS before the gold layer was evaporated.

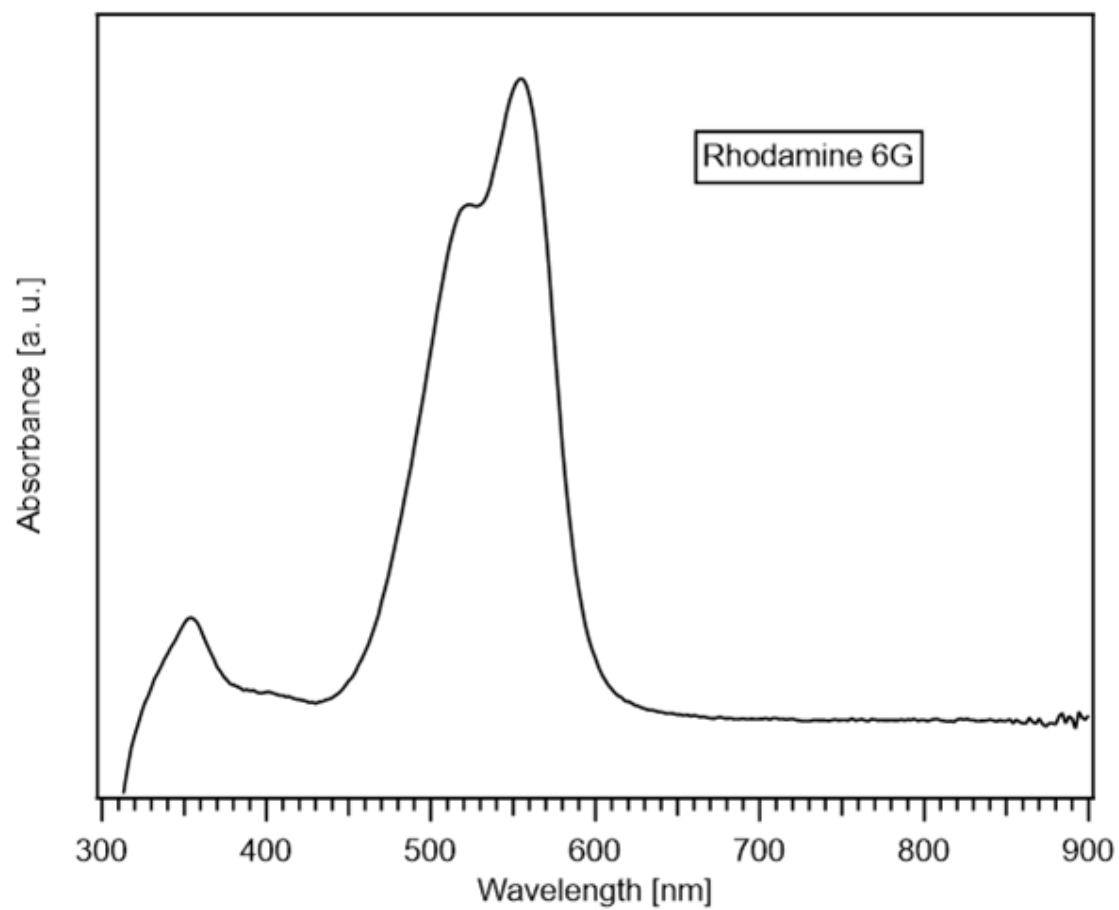

Fig. S3: UV – VIS Absorbance spectrum of  $10^{-3}$  M Rhodamine 6G dissolved in ethanol.

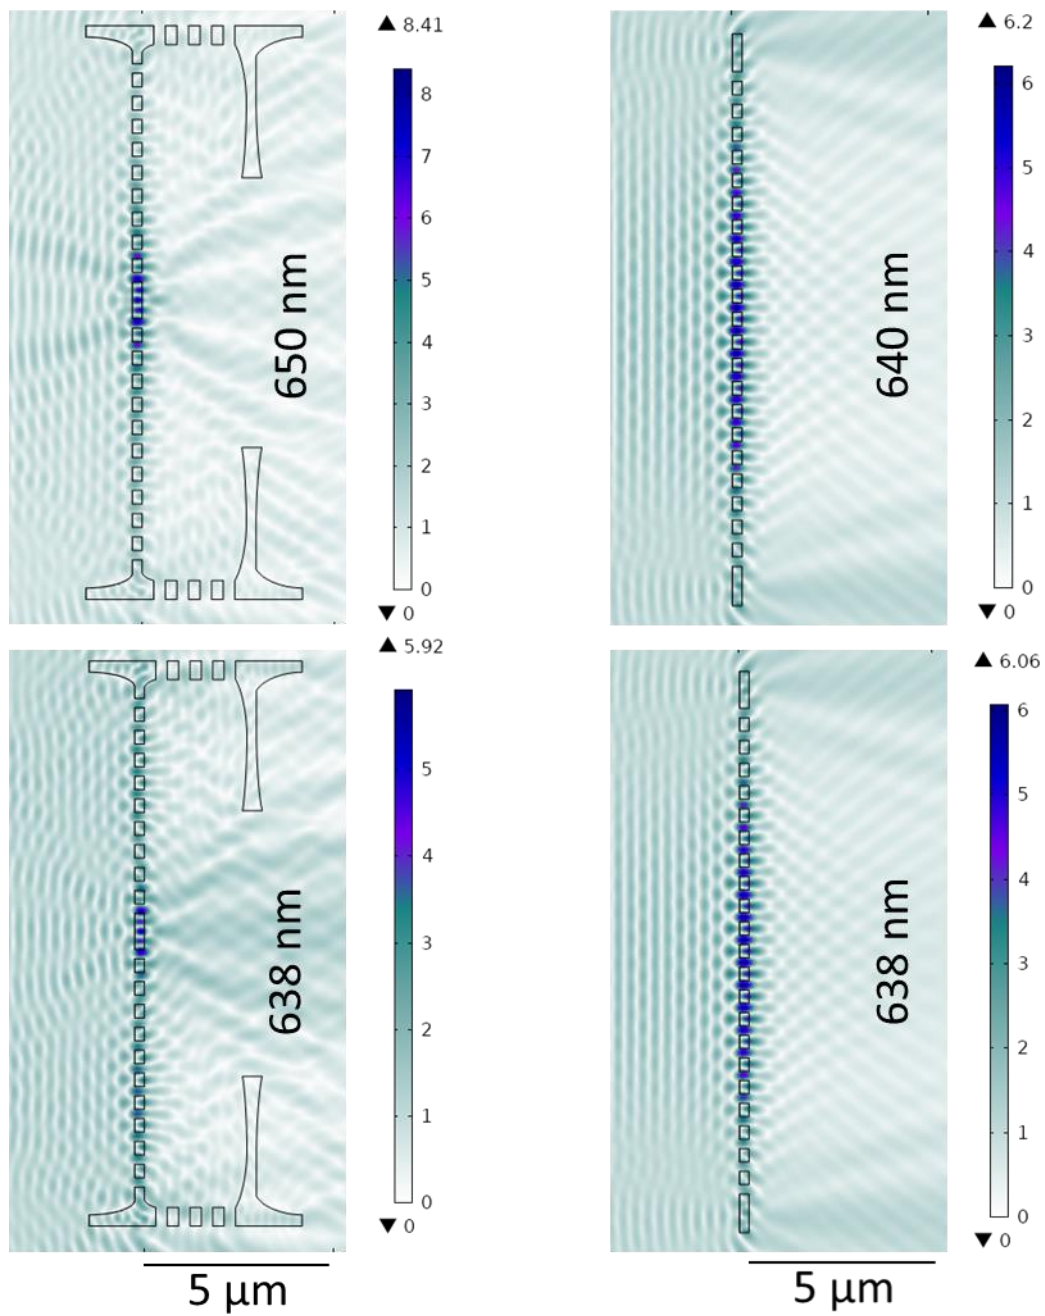

Fig. S4: The influence of defects (left) and the absence of curved edges (right) on GMR in Aulavalue.
